# Supplementary material for: Wave-Encoded Model-Based Deep Learning for Highly Accelerated Imaging with Joint Reconstruction
Source: MDPI journal article supplement (doi:10.3390/bioengineering9120736), 2022-11-29
Supplement: s1 [file s1]

## Supplementary Information

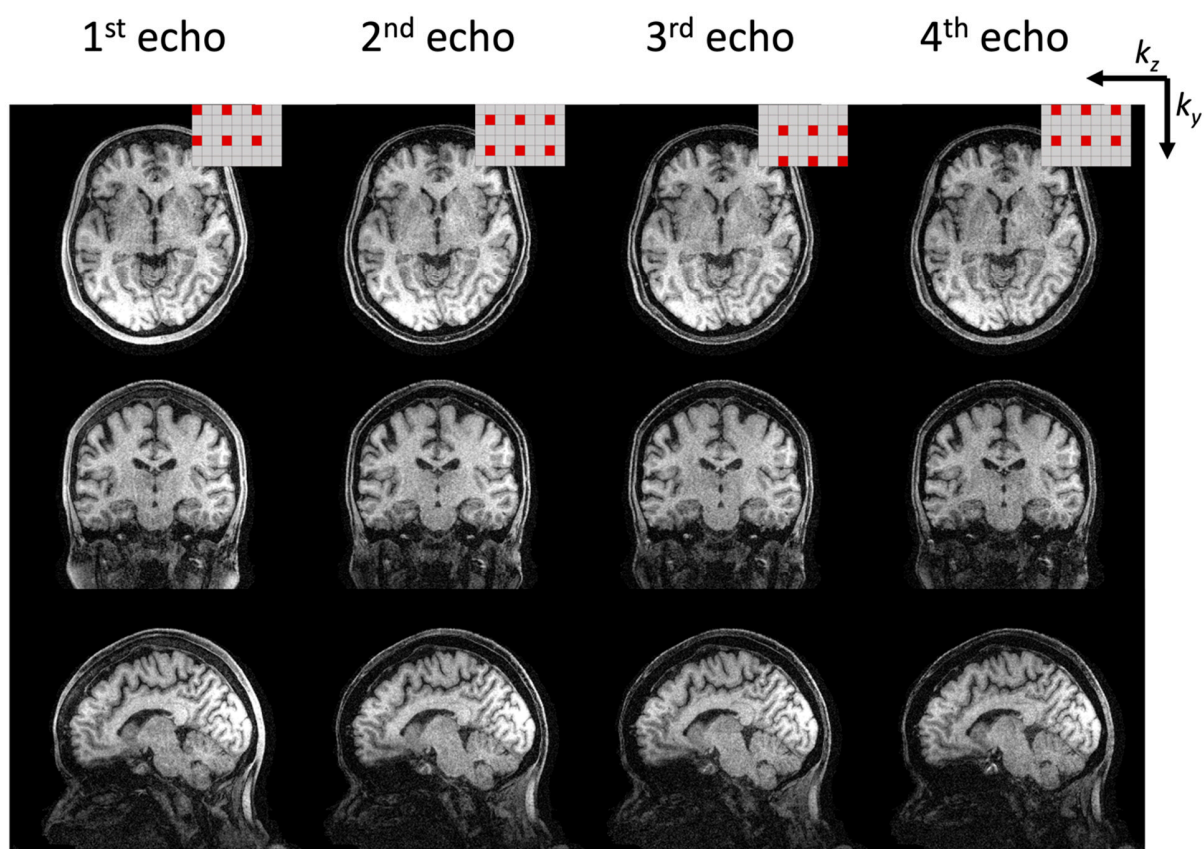

**Figure S1.** Each echo images of wave-MoDL at R=3x3-fold acceleration.

## 2:15-minute MEMPRAGE @ 0.8mm, R3x2

SENSE

MoDL

Wave-CAIPI

Wave-MoDL

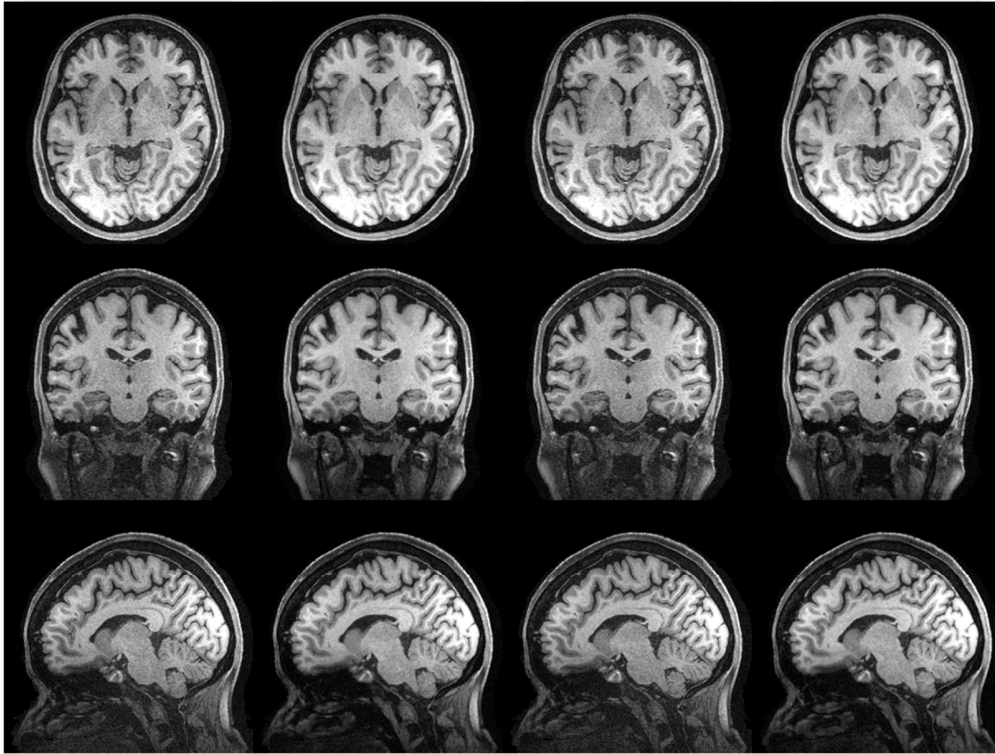

NRMSE : 11.91 %

8.42 %

9.40 %

7.58 %

**Figure S2.** The proposed method on the MEMPRAGE database at R=3x2-fold and 0.8 mm isotropic voxel resolution. Echo images were combined with root mean squared. NRMSEs were calculated for the entire testing database.

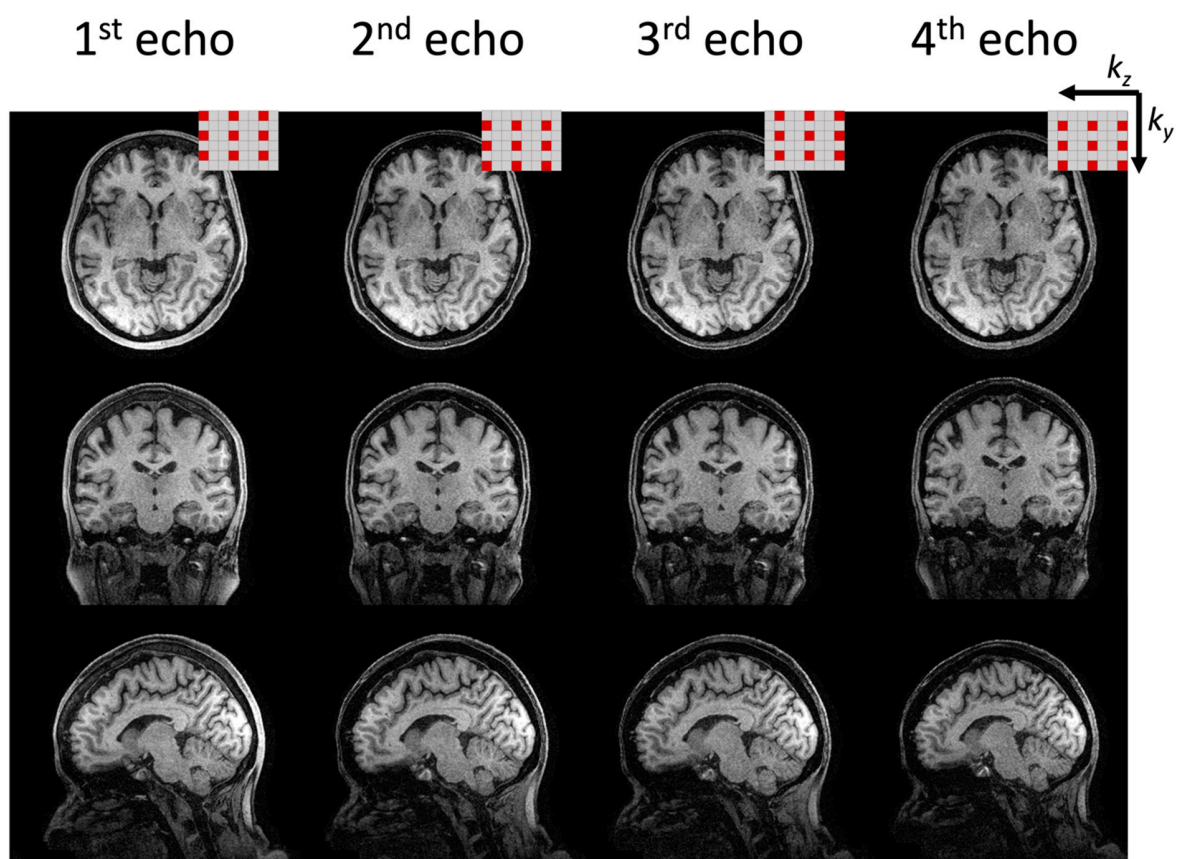

**Figure S3.** Each echo image of wave-MoDL at R=3x2-fold acceleration.

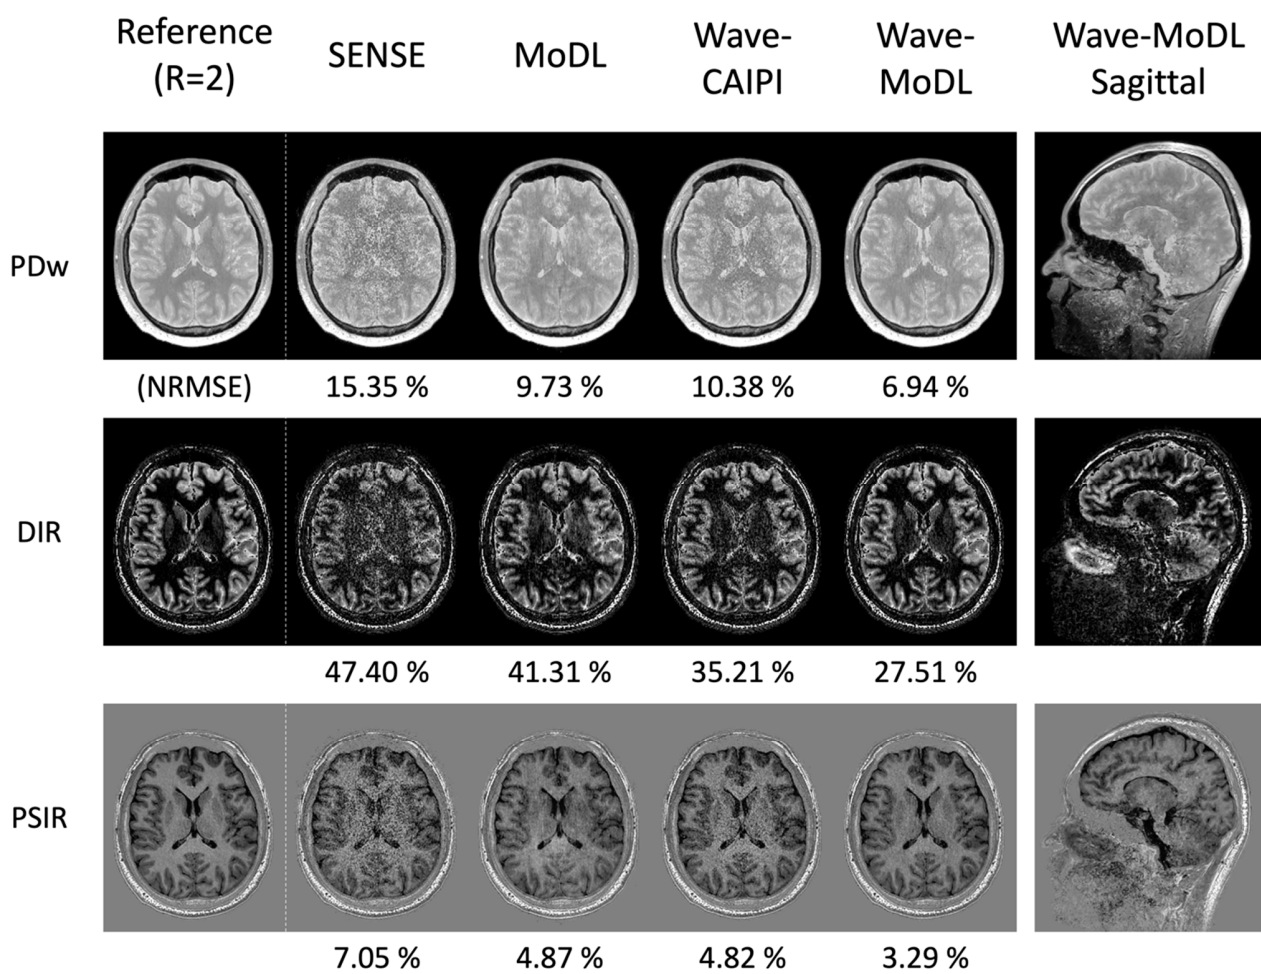

**Figure S4.** The synthesized double inversion recovery (DIR), and phase-sensitive inversion recovery (PSIR) images at R=4x3-fold acceleration.

## 1:30-minute MEMPRAGE @ 0.8mm, R3x3

Wave-CAIPI   Wave-LORAKS   U-net  
denoiser (1)   U-net  
denoiser (2)   Wave-MoDL

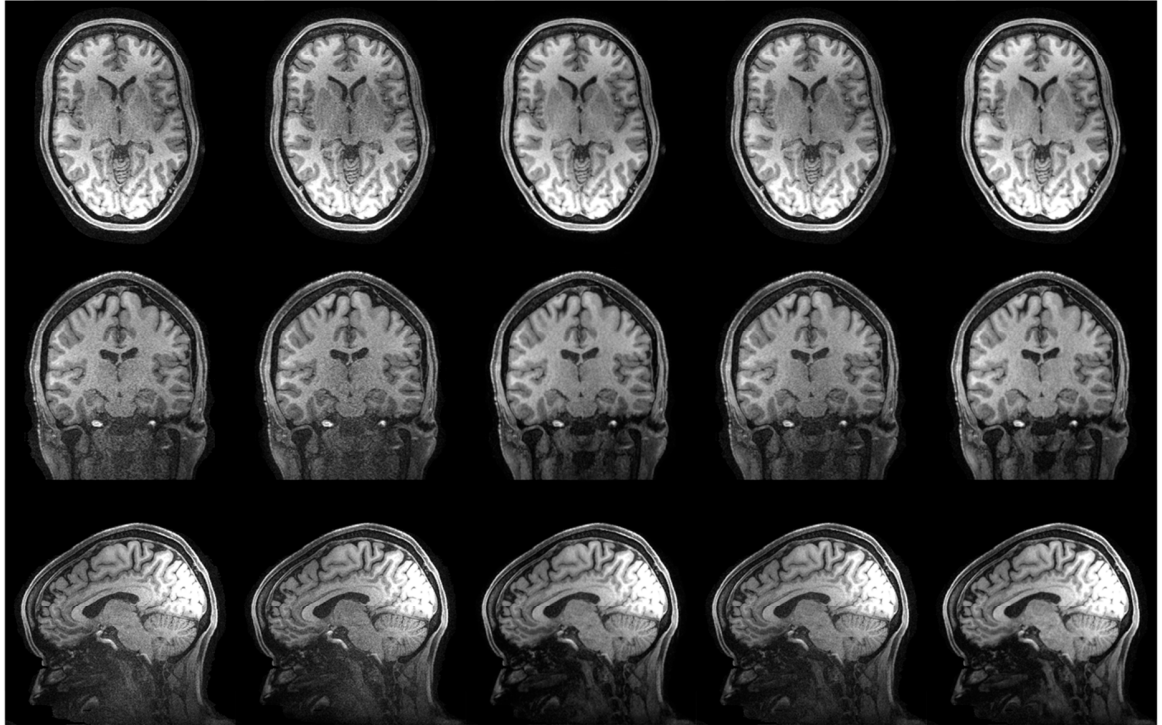

|            |         |         |            |         |         |
|------------|---------|---------|------------|---------|---------|
| NRMSE :    | 16.41 % | 13.44 % | 9.86 %     | 11.19 % | 11.18 % |
| SSIM :     | 0.8453  | 0.8683  | 0.7682     | 0.8235  | 0.9104  |
| # params : | -       | -       | 34,618,090 | 105,115 | 91,458  |

**Figure S5.** Wave-CAIPI, wave-LORAKS, U-net denoisers, and wave-MoDL on the MEMPRAGE database at R=3x3-fold and 0.8 mm isotropic voxel resolution. Echo images were combined with root mean squared. NRMSEs and SSIMs were calculated for the entire testing database.
